# Supplementary material for: Mediterranean versus vegetarian diet for cardiovascular disease prevention (the CARDIVEG study): study protocol for a randomized controlled trial
Source: PubMed Central journal article supplement (PMC4855805; doi:10.1186/s13063-016-1353-x), 2016-05-04
Supplement: 13063_2016_1353_MOESM2_ESM.pdf [file 13063_2016_1353_MOESM2_ESM.pdf]

Figure. Time schedule of enrolment, interventions, and assessments for participants

|                                    | STUDY PERIOD       |              |                 |             |               |                  |
|------------------------------------|--------------------|--------------|-----------------|-------------|---------------|------------------|
|                                    | Enrollment         | Allocation   | Post-allocation |             |               | End of the study |
| PROTOCOL ACTIVITY                  | <i>day-14 to 1</i> | <i>day 0</i> | <i>mo 1.5</i>   | <i>mo 3</i> | <i>mo 4.5</i> | <i>mo 6</i>      |
| TIMEPOINT                          | $-t_1$             | $t$          | $t_1$           | $t_2$       | $t_3$         | $t_4$            |
| <b>ENROLLMENT:</b>                 |                    |              |                 |             |               |                  |
| Eligibility screen                 | X                  |              |                 |             |               |                  |
| Informed consent                   | X                  |              |                 |             |               |                  |
| Demographic details                | X                  |              |                 |             |               |                  |
| Medical history                    | X                  |              |                 |             |               |                  |
| 3-day dietary records              | X                  |              |                 |             |               |                  |
| Allocation                         |                    | X            |                 |             |               |                  |
| <b>INTERVENTIONS:</b>              |                    |              |                 |             |               |                  |
| Vegetarian Diet                    |                    |              |                 |             |               |                  |
| Mediterranean Diet                 |                    |              |                 |             |               |                  |
| <b>ASSESSMENTS:</b>                |                    |              |                 |             |               |                  |
| <i>Anthropometric measurements</i> |                    | X            | X               | X           | X             | X                |
| <i>Body composition</i>            |                    | X            | X               | X           | X             | X                |
| <i>Blood samples</i>               |                    | X            |                 | X           |               | X                |
| <i>Stool samples</i>               |                    | X            |                 | X           |               | X                |
| Food Acceptability Questionnaire   |                    |              |                 | X           |               | X                |
| Adherence questionnaires           |                    |              | X               | X           | X             | X                |
| 24-hour diet recall                |                    |              |                 |             |               |                  |
